# Supplementary material
Source: PubMed Central journal article supplement (PMC10112338)
Supplement: id2c00458_si_004.pdf [file id2c00458_si_004.pdf]

## SUPPORTING INFORMATION

### Identification of human host substrates of the SARS-CoV-2 M<sup>pro</sup> and PL<sup>pro</sup> using subtiligase N-terminomics

Shu Y. Luo<sup>1</sup>, Eman W. Moussa<sup>1</sup>, Joaquin Lopez-Orozco<sup>2</sup>, Alberto Felix-Lopez<sup>3</sup>, Ray Ishida<sup>3</sup>, Nawell Fayad<sup>2</sup>, Erik Gomez-Cardona<sup>1</sup>, Henry Wang<sup>1</sup>, Joyce A Wilson<sup>4</sup>, Anil Kumar<sup>4</sup>, Tom C. Hobman<sup>2,3,5</sup>, Olivier Julien<sup>1,5\*</sup>

<sup>1</sup>Department of Biochemistry, University of Alberta, Edmonton, AB, T6G 2H7, Canada

<sup>2</sup>Department of Cell Biology, University of Alberta, Edmonton, AB, T6G 2H7, Canada

<sup>3</sup>Department of Medical Microbiology & Immunology, University of Alberta, Edmonton, AB, T6G 2H7, Canada

<sup>4</sup>Department of Biochemistry, Microbiology & Immunology, University of Saskatchewan, Saskatoon, SK, S7N 5E5, Canada

<sup>5</sup>Li Ka Shing Institute of Virology, Edmonton, AB, T6G 2E1, Canada

Please address correspondence to: \*ojulien@ualberta.ca

## Table of Content

|            |                                                                                  |
|------------|----------------------------------------------------------------------------------|
| Figure S1  | SARS-CoV-2 M <sup>pro</sup> expression and purification                          |
| Figure S2  | SARS-Cov-2 PL <sup>pro</sup> expression and purification                         |
| Figure S3  | M <sup>pro</sup> N-terminomics statistics                                        |
| Figure S4  | PL <sup>pro</sup> N-terminomics statistics                                       |
| Figure S5  | Cleavage assay of GFP-BRD2 by M <sup>pro</sup> with and without GC376            |
| Figure S6  | Full immunoblot images of Figure 3                                               |
| Figure S7  | Additional immunoblots of SARS-CoV-2 infected A549-ACE2                          |
| Figure S8  | Additional immunoblots of SARS-CoV-2 infected HEK293T-ACE2                       |
| Figure S9  | Immunoblots of SARS-CoV-2 infected H23-ACE2                                      |
| Figure S10 | Cleavage of SFPQ by PL <sup>pro</sup> additional validation                      |
| Figure S11 | Metascape analysis of M <sup>pro</sup> and PL <sup>pro</sup> putative substrates |
| Figure S12 | TopFind analysis of M <sup>pro</sup> and PL <sup>pro</sup> putative substrates   |
| Figure S13 | Cleavage of M <sup>pro</sup> substrates not detectable by immunoblots            |
| Figure S14 | Full immunoblot images of Figure 4                                               |
| Table S1   | Antibodies and plasmids used in the study                                        |

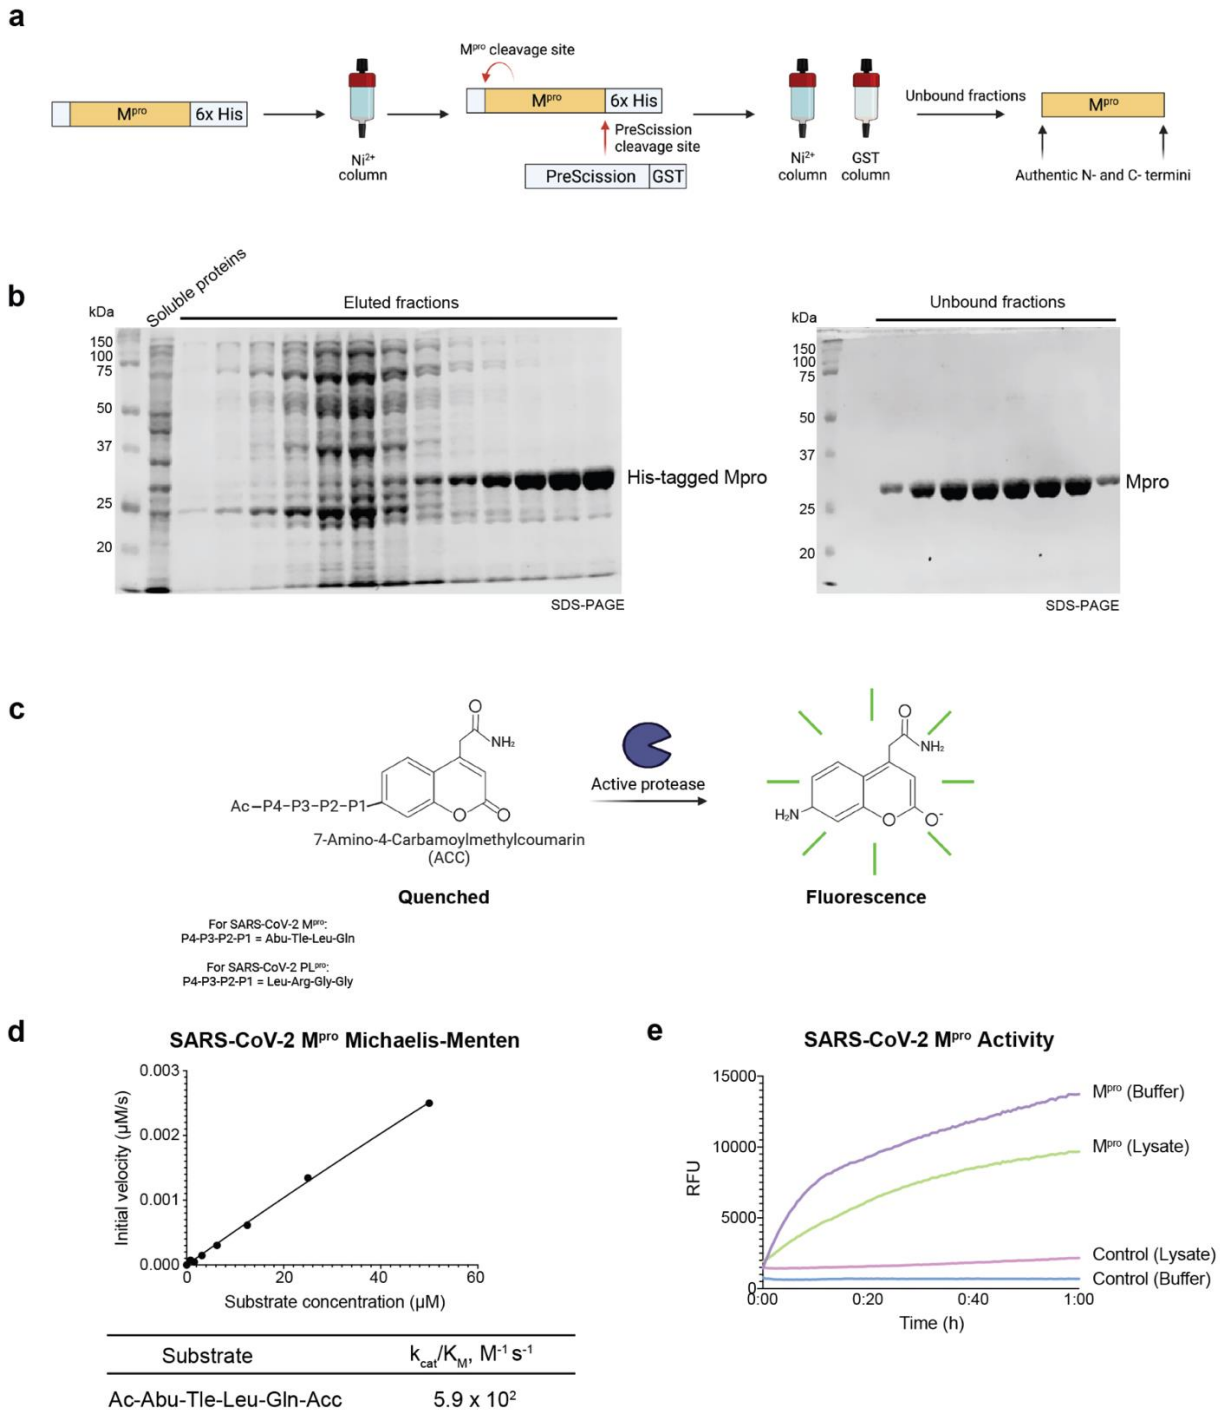

**Figure S1. Plasmid construct, protein expression and purification of SARS-CoV-2 M<sup>pro</sup>.** **a,b**) SARS-CoV-2 M<sup>pro</sup> was expressed and purified by affinity purification with authentic N- and C-termini. **c**) The fluorescence activity assay was carried out using the optimal coumarin substrate Ac-Abu-Tle-Leu-Gln-ACC. **d**) The enzyme kinetics assay was performed using 0.09  $\mu$ M M<sup>pro</sup>, and 0.78 to 50  $\mu$ M coumarin substrate in 100  $\mu$ L total assay volume. The  $k_{cat}/K_M$  was calculated using the linear region of the Michaelis-Menten curve  $k_{cat}/K_M = \text{slope} / [E]$ , (1) and is consistent with previously reported value. (2) **e**) The protease activity was monitored in parallel with the reverse N-terminomics, in cell-free conditions and cell lysates with 0.5  $\mu$ M M<sup>pro</sup> and 2  $\mu$ M coumarin substrate, showing that it was proteolytically active.

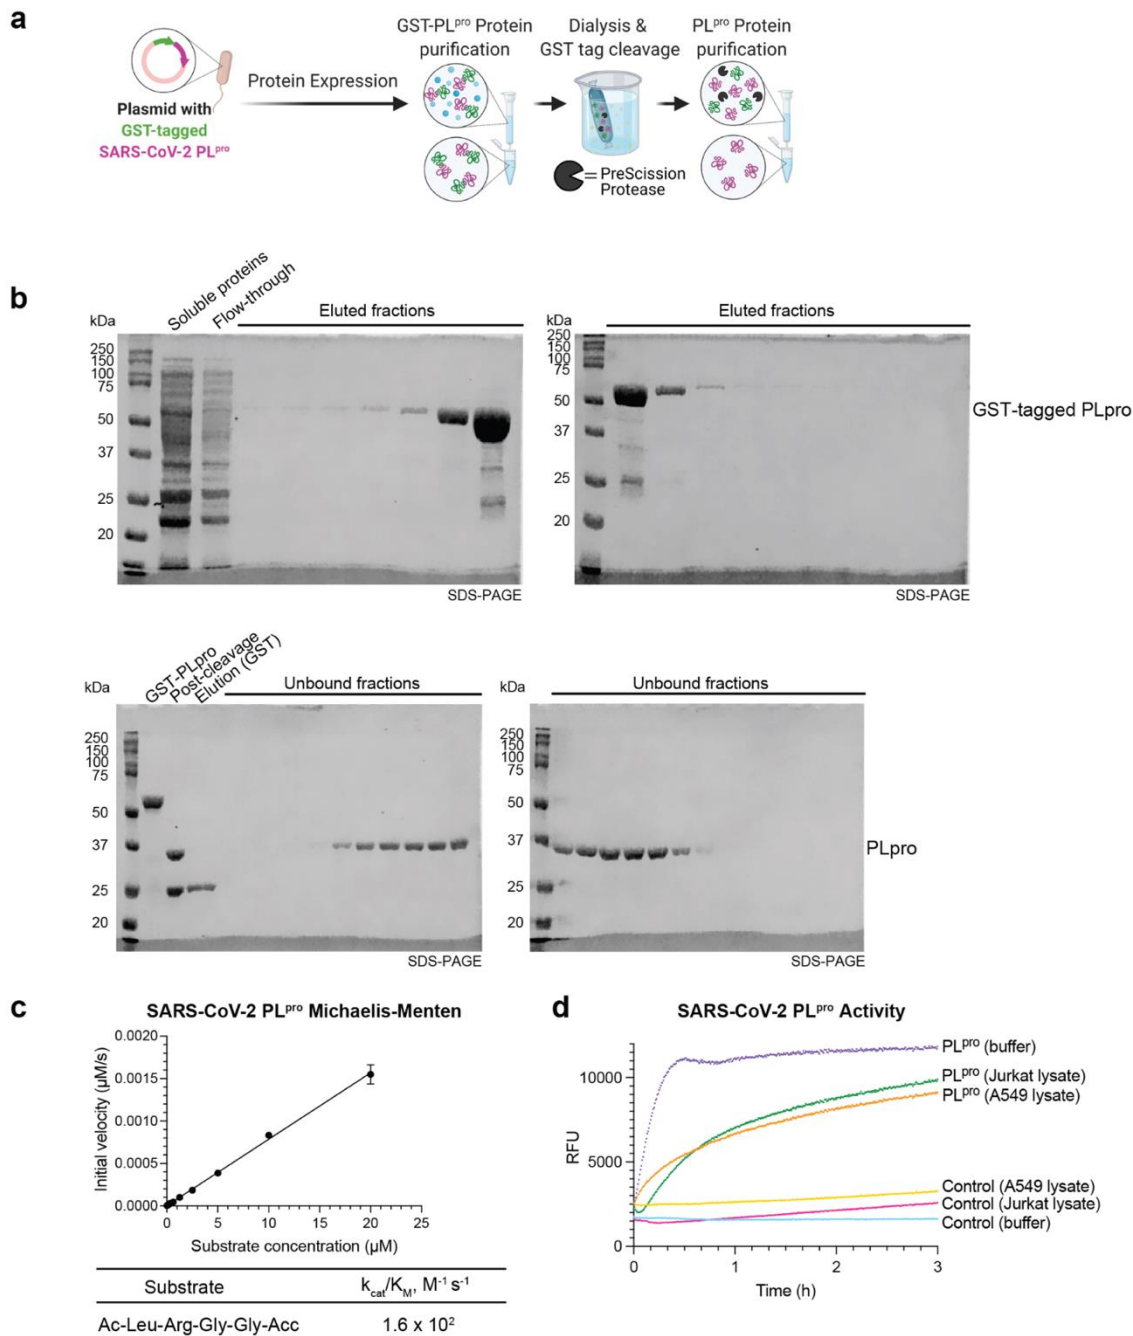

**Figure S2. Protein expression, purification and activity of PL<sup>pro</sup>.** **a)** PL<sup>pro</sup> expression and purification was conducted using a plasmid encoding for the protease domain of Nsp3 with an N-terminal GST tag. GST-PL<sup>pro</sup> is purified from *E. coli* lysates using a glutathione sepharose column. The GST tag is removed in an overnight dialysis using a PreScission protease. **b)** Prior to removal of the GST tag, GST-PL<sup>pro</sup> is collected in the elution fractions. Following GST tag removal, the PreScission protease and GST-tag remain bound to the column and collected in the second elution while PL<sup>pro</sup> is obtained in the unbound fractions. **c)** The fluorescence activity assay was carried out using the optimal coumarin substrate Ac-Leu-Arg-Gly-Gly-ACC (see Fig. S1c). The enzyme kinetics assay was performed using 0.5 μM PL<sup>pro</sup>, and 0.78 to 20 μM coumarin substrate in 100 μL total assay volume. The  $k_{cat}/K_M$  was calculated using the linear region of the Michaelis-Menten curve  $k_{cat}/K_M = \text{slope} / [E]$ . (1) **d)** The activity of 5 μM PL<sup>pro</sup> was measured using 10 μM of the coumarin substrate in buffer, A549 and Jurkat cell lysates.

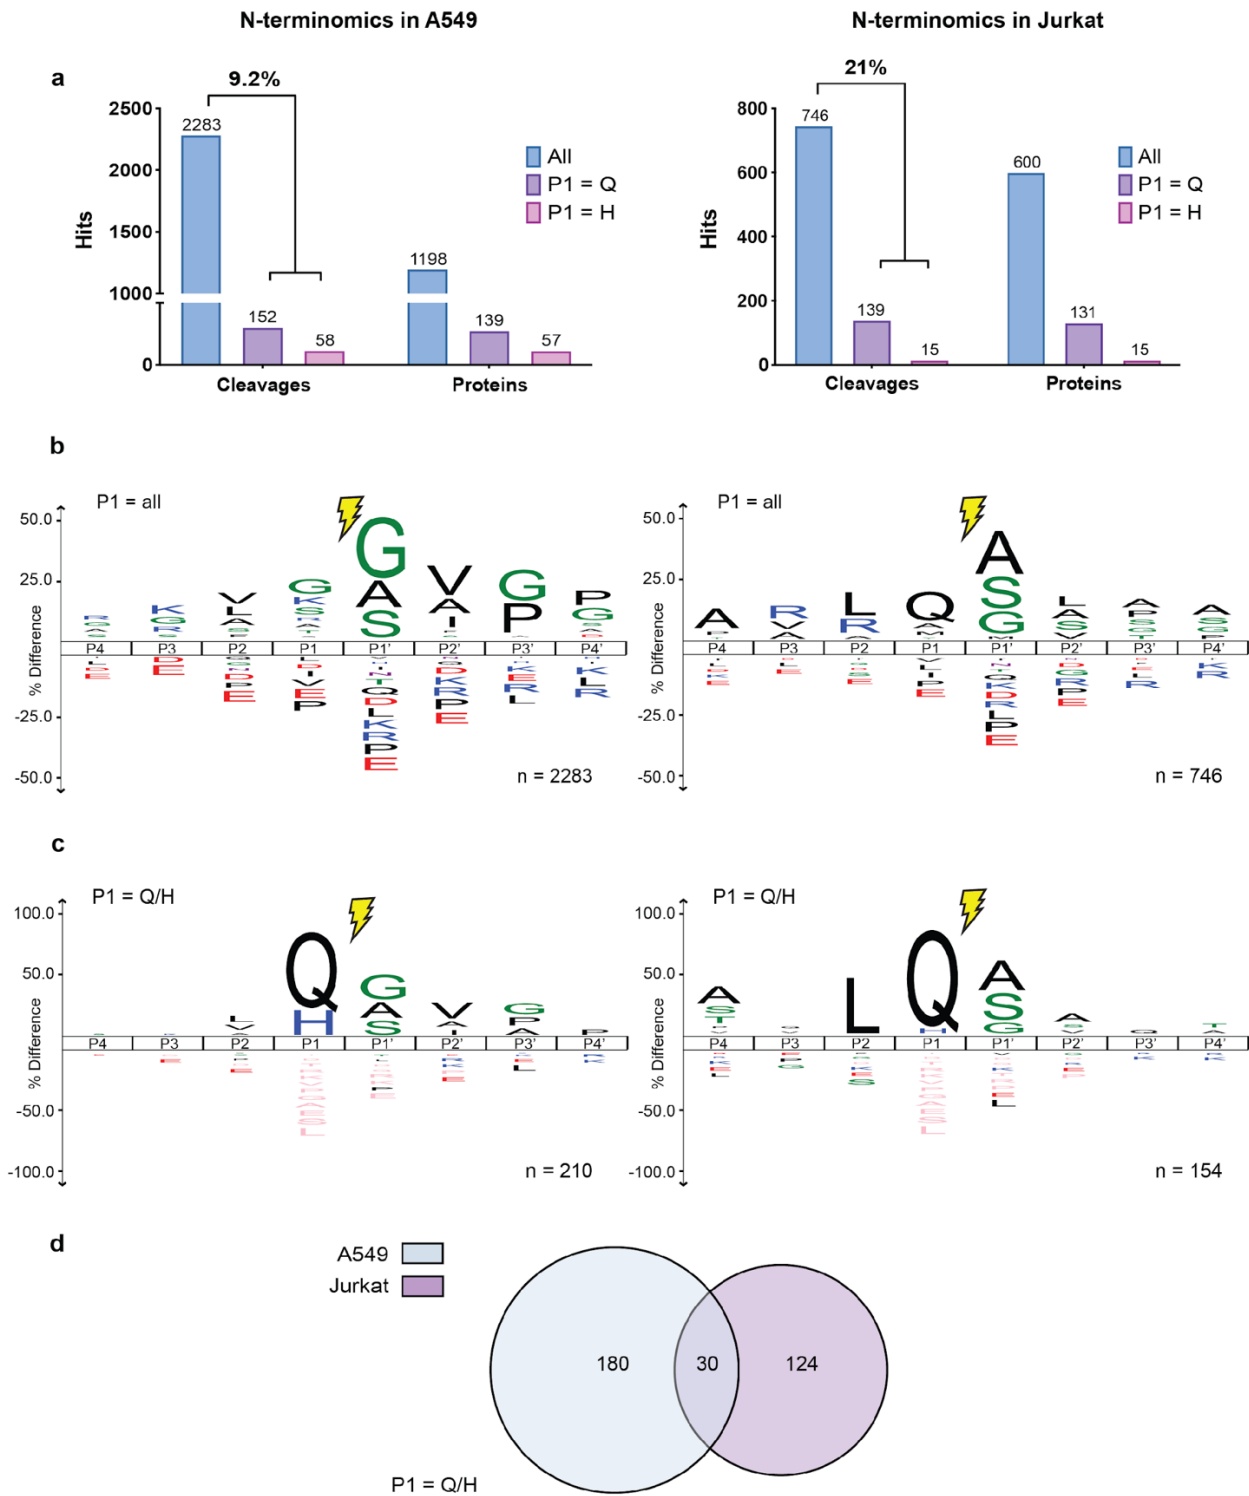

**Figure S3. Identification of SARS-CoV-2 M<sup>pro</sup> substrates.** **a)** N-terminomics statistics of two A549 replicates (left) and of two Jurkat replicates (right). In A549, 2283 unique cleavages were labeled, and 210 sites in 196 host proteins correspond to SARS-CoV-2 M<sup>pro</sup> specificity with Gln or His at P1 residue (P1=Q/H) at 9.2% enrichment rate. In Jurkat, 746 unique labeled cleavages were identified with 154 sites at P1=Q/H in 146 proteins, showing an enhanced enrichment at 21%. **b)** IceLogo showing P4-P4' residue enrichment in all labeled cleavage sites in A549 (left) and Jurkat (right), and **c)** in sites where P1=Q/H only. **d)** Venn diagram showing the overlap in P1=Q/H cleavages between the A549 and Jurkat proteomes.

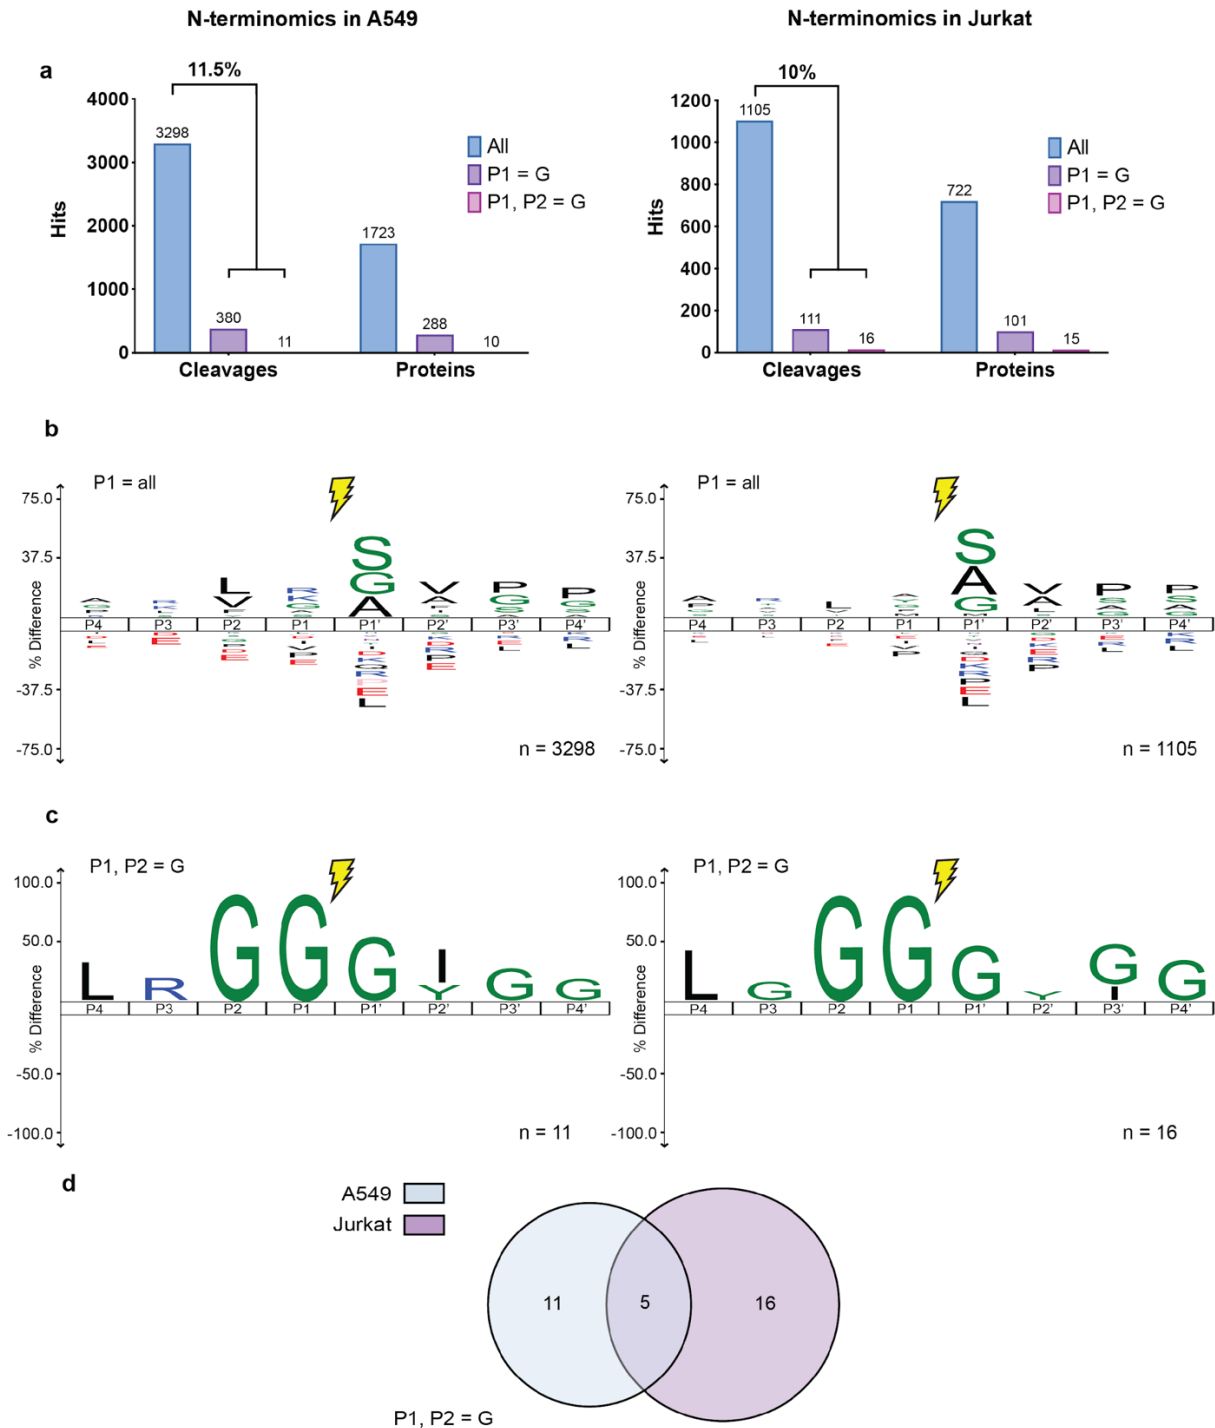

**Figure S4. Identification of SARS-CoV-2 PL<sup>pro</sup> substrates.** **a)** N-terminomics statistics of two A549 (left) and two Jurkat (right) replicates for PL<sup>pro</sup>. In A549, 3298 unique labeled cleavages were identified with 380 sites at P1=G and 11 sites at P1,P2=G in 288 and 10 proteins, respectively, showing an enhanced enrichment for P1=G at 11.5%. In Jurkat, 1105 unique labeled cleavages were identified with 111 sites at P1=G and 16 sites at P1,P2=G in 101 and 15 proteins, respectively, showing an enhanced enrichment for P1=G at 10%. **b)** Icelogo showing P4-P4' residue enrichment in all labeled cleavage sites in A549 (left) and Jurkat (right), and **c)** in sites where P1,P2=G only. **d)** Venn diagram depicting the overlap in cleavage sites identified in A549 and Jurkat with P1,P2=G.

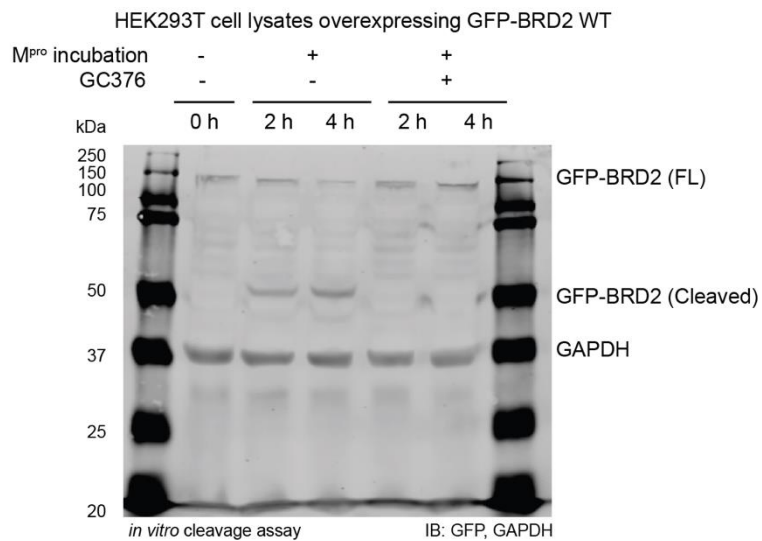

**Figure S5. BRD2 is cleaved by SARS-CoV-2 M<sup>pro</sup>** (n=2, biological replicates). HEK293T cell lysates overexpressing GFP-BRD2 were incubated with 0.5  $\mu$ M M<sup>pro</sup> for 0, 2, and 4 h in the absence or presence of 8  $\mu$ M M<sup>pro</sup> inhibitor GC376 (Selleck Chemicals, #S0475, dissolved in DMSO). GFP-BRD2 cleavage product was only observed without GC376 in the assay.

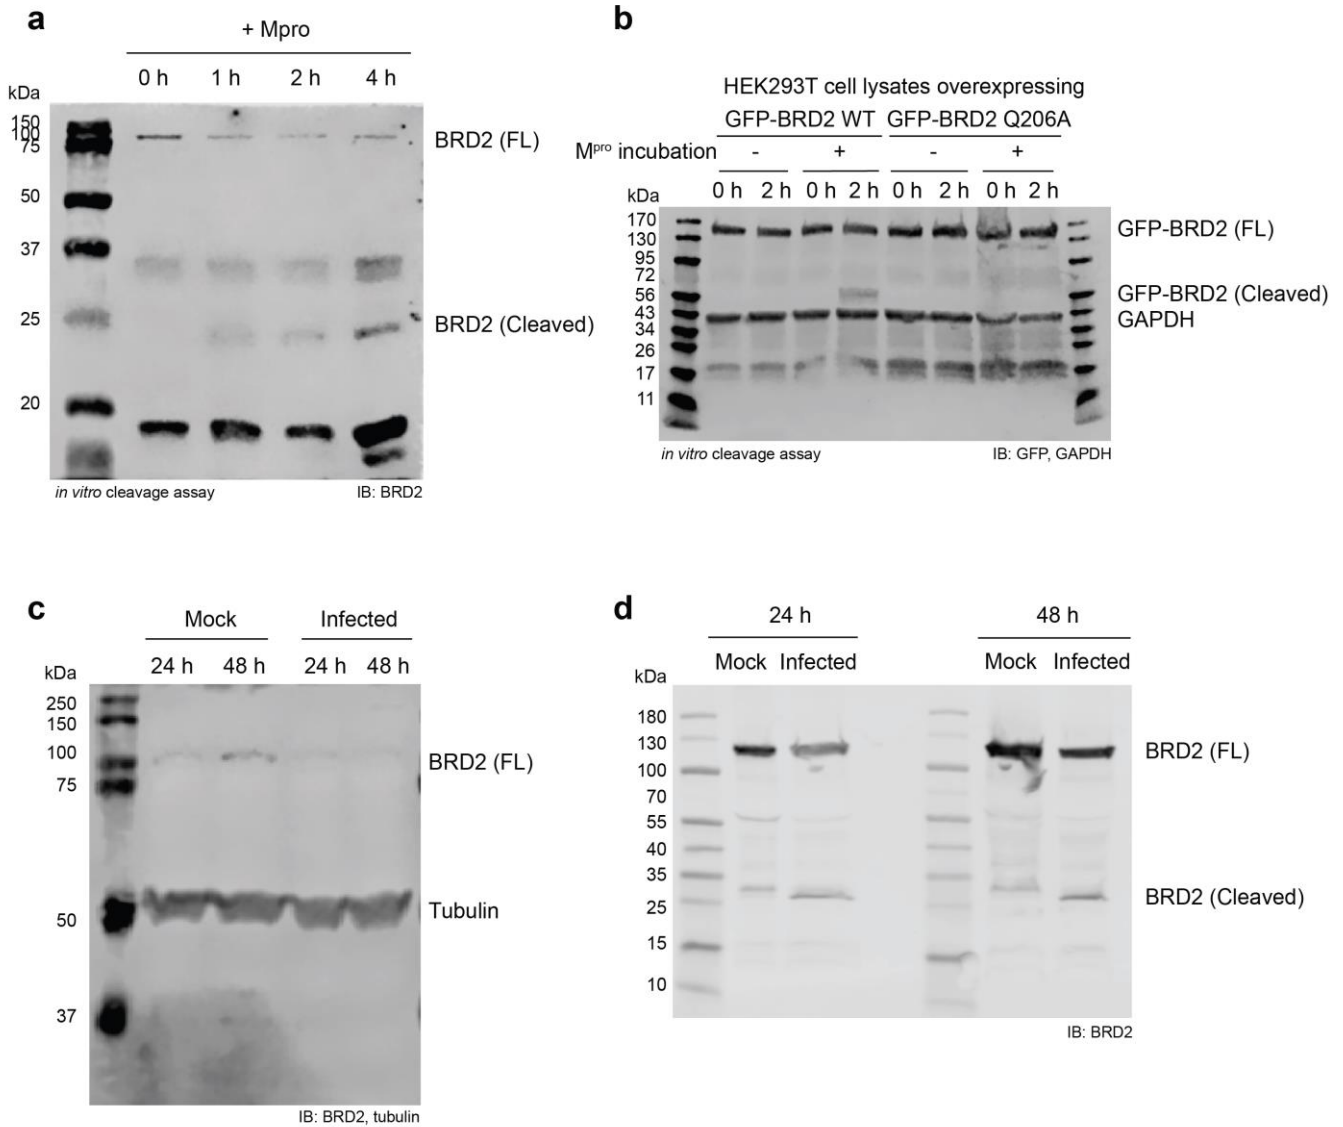

**Figure S6. Full immunoblot images of Fig. 3. Proteolysis of BRD2 by M<sup>pro</sup> *in vitro* and in SARS-CoV-2 infected cells.** a) BRD2 was cleaved by recombinant M<sup>pro</sup> in Jurkat cell lysates. Jurkat cell lysates were incubated with recombinant M<sup>pro</sup> for 0-4 hours, and immunoblotted against BRD2. A cleavage product at 23 kDa appeared with incubation time as the full length BRD2 level decreased. b) GFP-BRD2 WT and mutant Q206A overexpression in HEK293T-ACE2 and *in vitro* cleavage by recombinant SARS-CoV-2 M<sup>pro</sup>. HEK293T-ACE2 cells overexpressing GFP-BRD2 were lysed, and the cell lysates were incubated with M<sup>pro</sup> for 2 hours and immunoblotted against GFP. Cleavage was only observed with GFP-BRD2 WT. Depletion of full-length BRD2 was also observed in SARS-CoV-2 infected c) A549-ACE2 and d) HEK293T-ACE2 at 24 and 48 h.p.i.



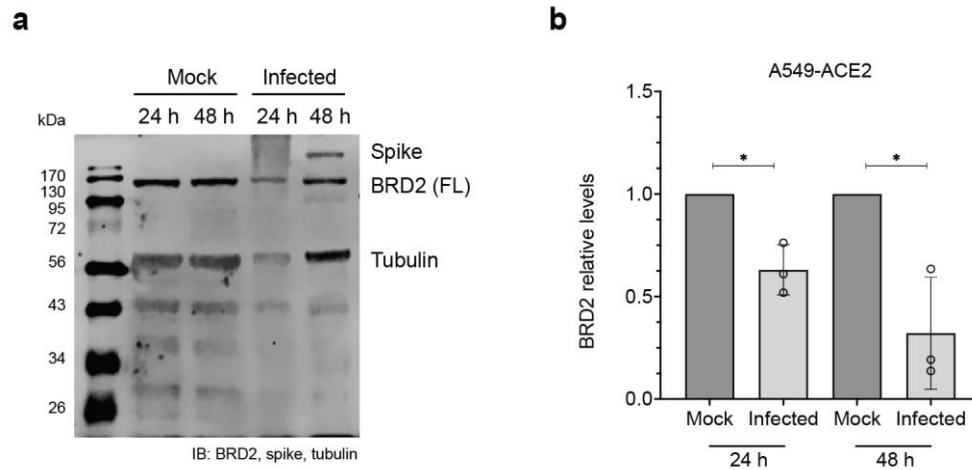

**Figure S7. Additional immunoblot of SARS-CoV-2 infected A549-ACE2 cell lysates and BRD2 quantification.** **a)** Another representative replicate was performed in addition to the blot presented in Figure 3 of the main manuscript, for a total of  $n=3$ , biological replicates. **b)** Quantification of BRD2 levels at 24 h and 48 h after infection with SARS-CoV-2 compared to mock. BRD2 levels measured were  $0.6 \pm 0.1$  (24 h) and  $0.3 \pm 0.3$  (48 h), with a  $*p < 0.05$  using Student's t-test.

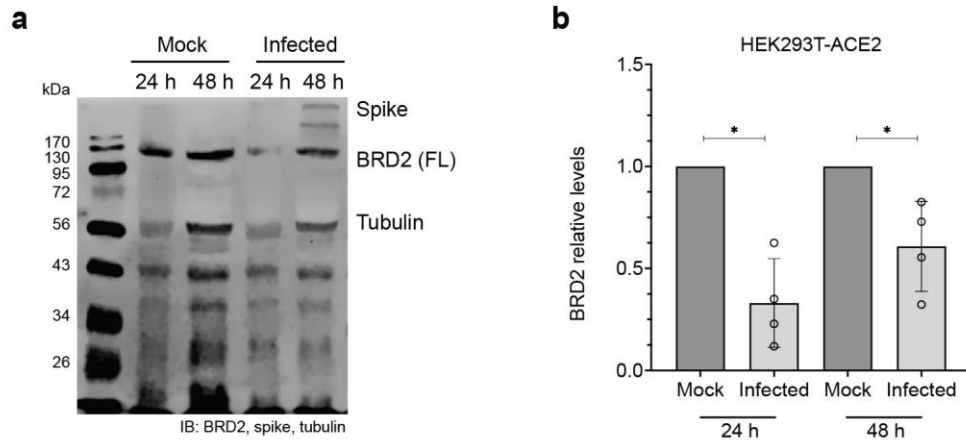

**Figure S8. Additional immunoblot of SARS-CoV-2 infected HEK293T-ACE2 cell lysates and BRD2 quantification.** **a)** Another representative replicate was performed in addition to the blot presented in Figure 3 of the main manuscript, for a total of  $n=4$ , biological replicates. **b)** Quantification of BRD2 levels at 24 h and 48 h after infection with SARS-CoV-2 compared to mock. BRD2 levels measured were  $0.3 \pm 0.2$  (24 h) and  $0.6 \pm 0.2$  (48 h), with a  $*p < 0.05$  using Student's t-test.

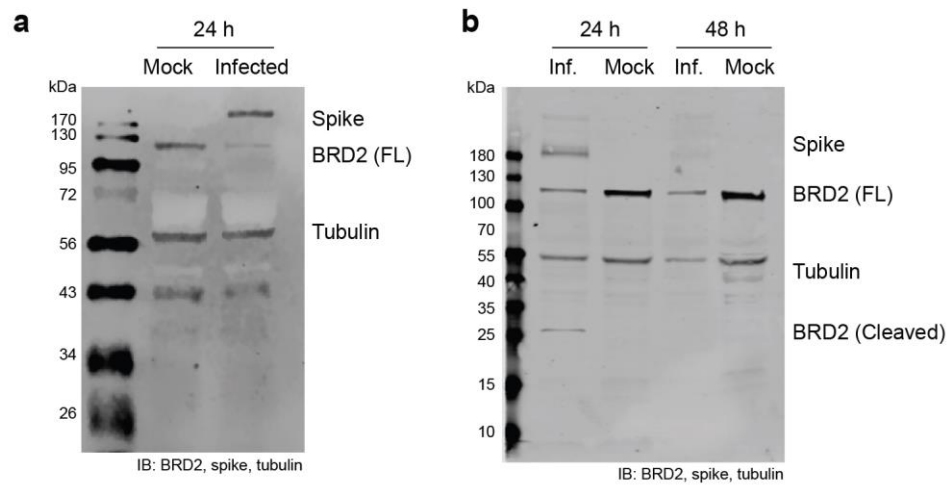

**Figure S9. Immunoblots of SARS-CoV-2 infected H23-ACE2 cell lysates in two biological replicates. a,b)** A decrease in full-length BRD2 level was observed at 24 h.p.i., as most Infected cells underwent apoptosis at 48 h. A band corresponding to the apparent cleavage product of BRD2 at ~23 kDa was present in **b**).

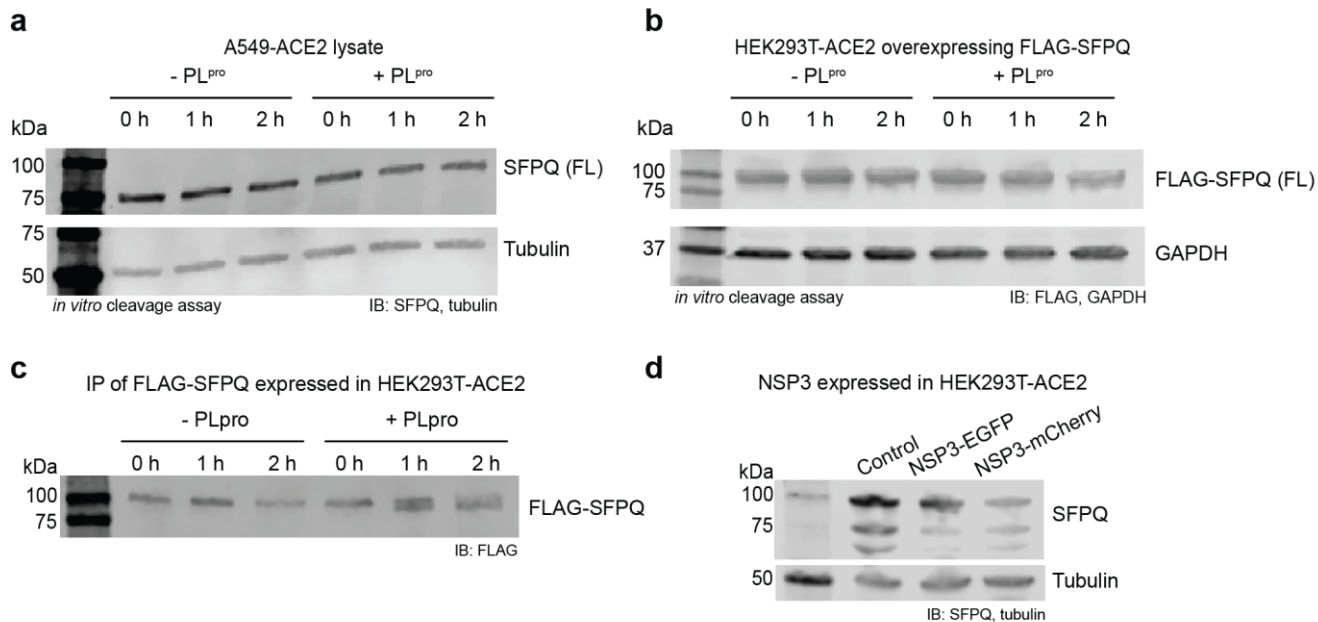

**Figure S10. Additional investigation of cleavage of SFPQ by PL<sup>pro</sup> *in vitro*** (n=2, biological replicates). **a**) Uninfected A549-ACE2 cell lysates were incubated with PL<sup>pro</sup> and SFPQ cleavage by PL<sup>pro</sup> could not be detected using immunoblotting. **b**) Cleavage of overexpressed FLAG-tagged SFPQ in HEK293T-ACE2 cells by PL<sup>pro</sup> was also not detected on immunoblot. **c**) A potential cleavage product was observed when incubating immunoprecipitated FLAG-SFPQ with SARS-CoV-2 PL<sup>pro</sup>. **d**) Expression of full length NSP3 in HEK293T-ACE2 did not show distinct cleavage of SFPQ compared to the control.

a

SARS-CoV-2 M<sup>pro</sup> putative targets

A549

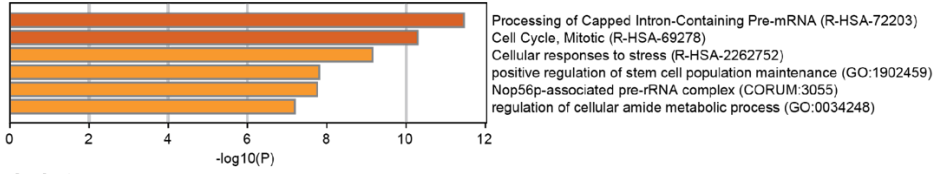

Jurkat

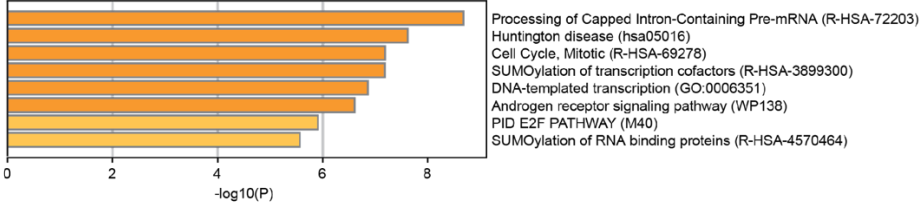

All

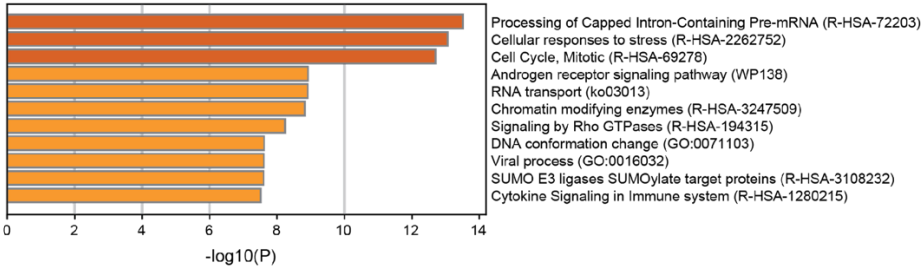

b

SARS-CoV-2 PL<sup>pro</sup> putative targets

A549

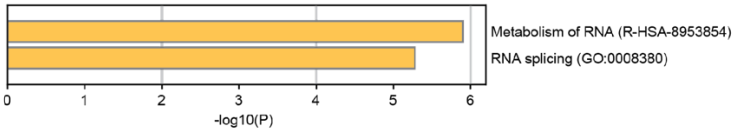

Jurkat

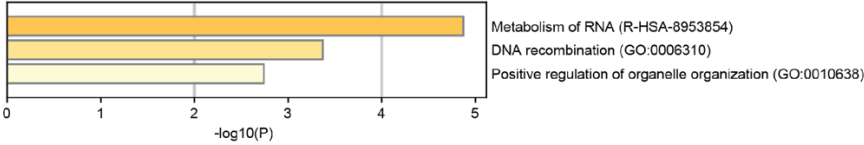

All

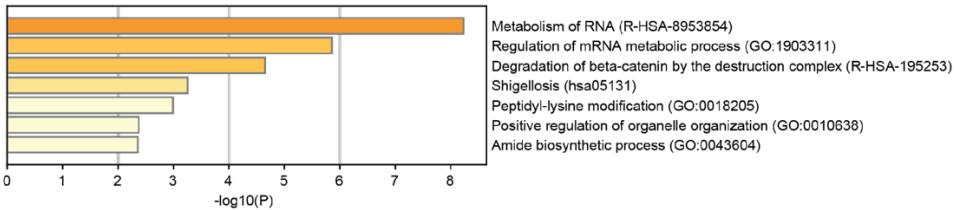

**Figure S11. Gene Ontology analysis of a) M<sup>pro</sup> and b) PL<sup>pro</sup> putative substrates in A549, Jurkat, and both A549 and Jurkat cell lysates using Metascape. (3)**

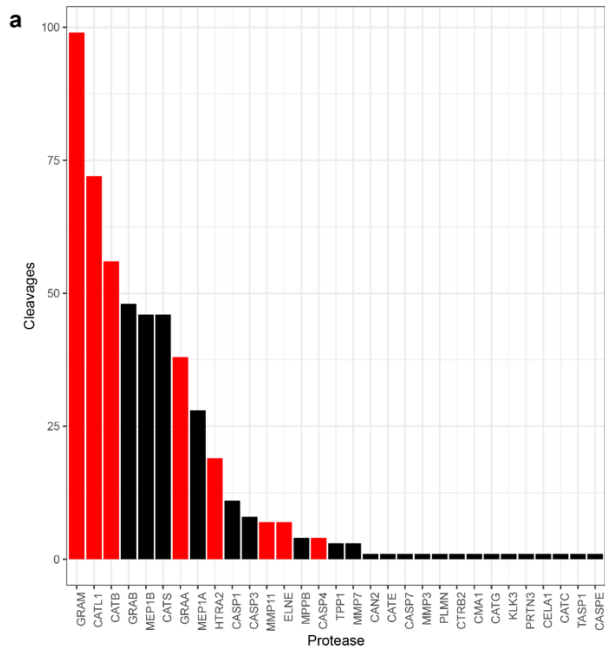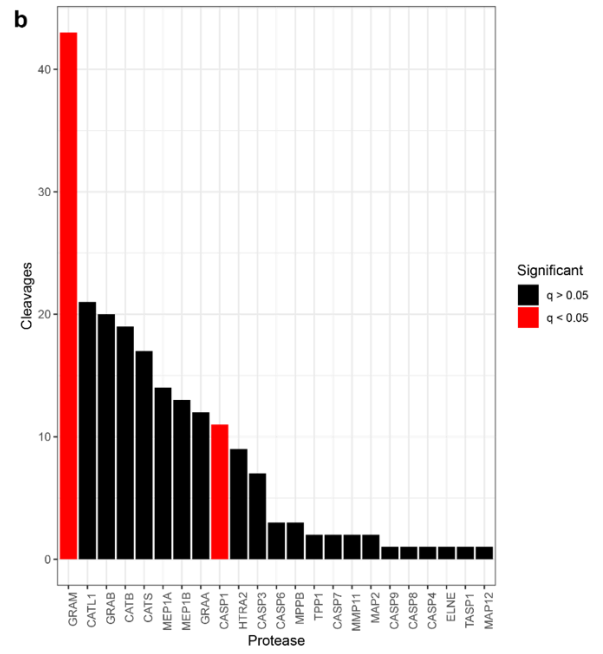

**Figure S12. TopFind analysis of all labeled cleavage sites in a) M<sup>pro</sup> and b) PL<sup>pro</sup> subtiligase N-terminomics experiments.**

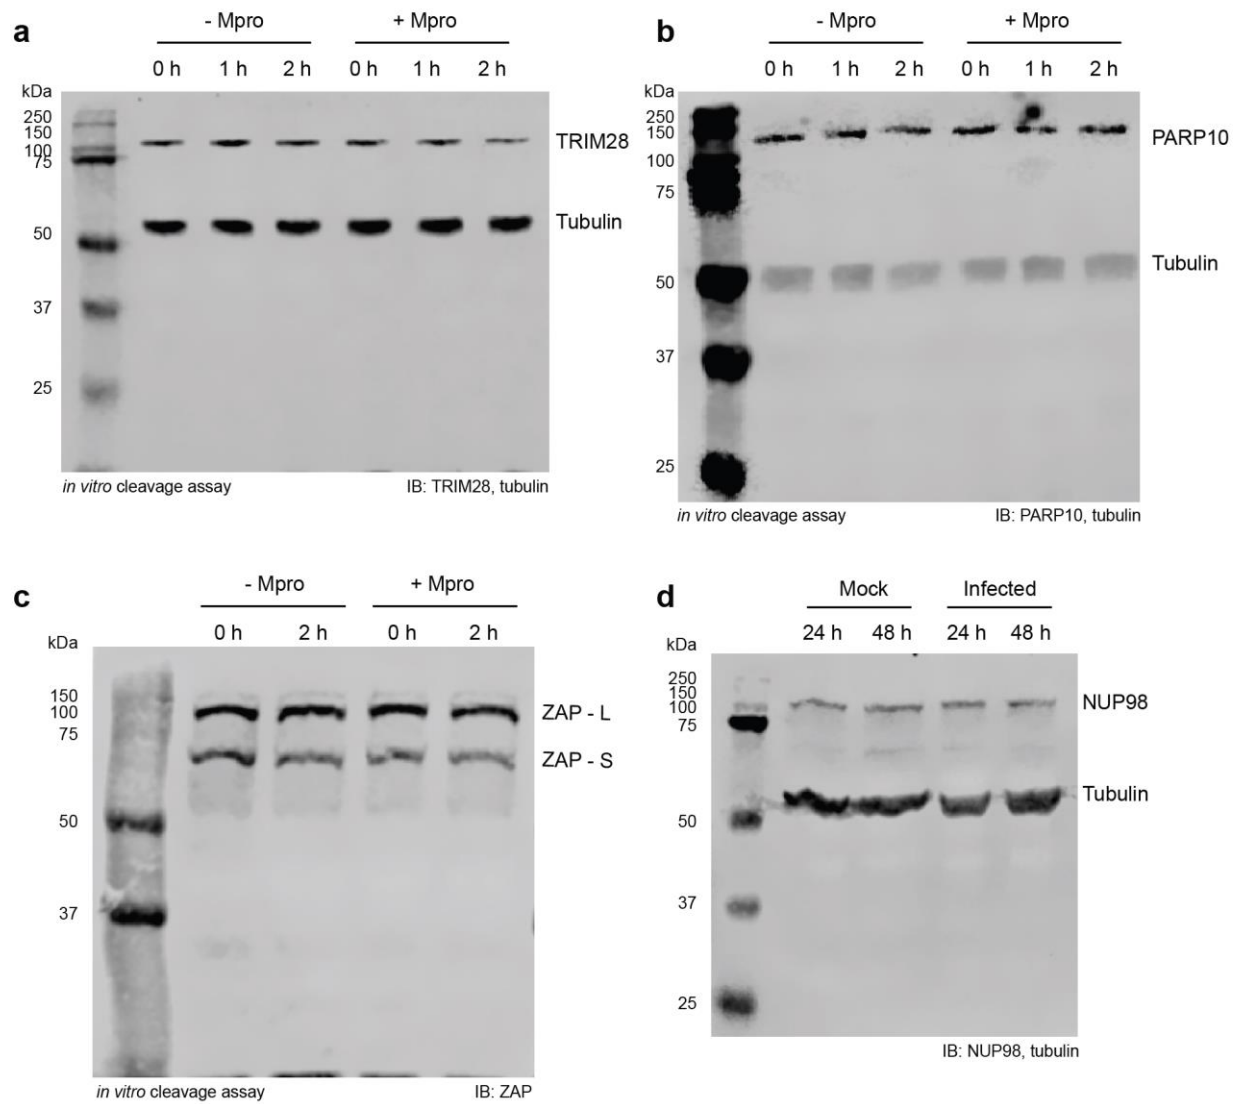

**Figure S13. Substrate proteolysis by M<sup>pro</sup> was not detectable by immunoblot for a) *in vitro* cleavage assays of TRIM28 in Jurkat lysates; b) *in vitro* cleavage assays of PARP10 in Jurkat lysates; c) *in vitro* cleavage assays of ZAP in A549 lysates; and d) endogenous NUP98 level in infected A549-ACE2 cells. This suggests that these targets can be cleaved by M<sup>pro</sup>, but only at a low level detectable only by mass spectrometry.**

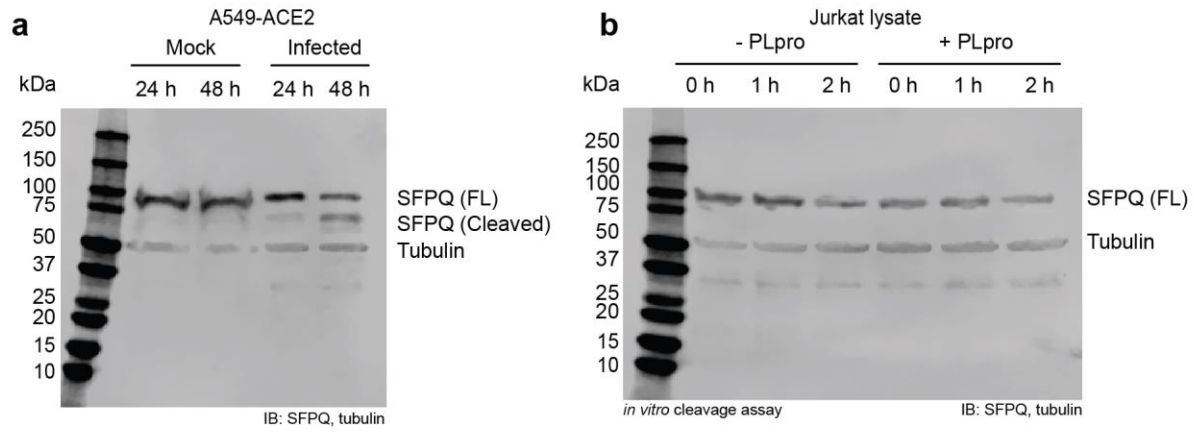

**Figure S14. Full immunoblot images of Fig 4. Proteolysis of SFPQ in SARS-CoV-2 infected cells** (n=2, biological replicates). **a)** SFPQ was cleaved in A549-ACE2 cells infected with SARS-CoV-2. **b)** SFPQ cleavage by PL<sup>pro</sup> could not be detected using immunoblotting for Jurkat cell lysates.



**Table S1. Antibodies and plasmids used in the study.**

| Acc #   | Gene Name         | Sources        | Catalog #  | Plasmids for overexpression studies                                                                                                                            |
|---------|-------------------|----------------|------------|----------------------------------------------------------------------------------------------------------------------------------------------------------------|
| Q13263  | TRIM28            | R&D Systems    | MAB7785    | <a href="https://www.addgene.org/45569/">https://www.addgene.org/45569/</a>                                                                                    |
| Q7Z2W4  | ZC3HAV1           | Proteintech    | 16820-1-AP | <a href="https://www.addgene.org/45907/">https://www.addgene.org/45907/</a>                                                                                    |
|         |                   | GeneTex        | GTX120134  | <a href="https://www.addgene.org/45906/">https://www.addgene.org/45906/</a>                                                                                    |
| P52948  | NUP98             | Wozinak Lab    |            | -                                                                                                                                                              |
| P25440  | BRD2              | Abcam          | ab139690   | <a href="https://www.addgene.org/65376/">https://www.addgene.org/65376/</a>                                                                                    |
| Q53GL7  | PARP10            | LSBio          | LS-C747885 | -                                                                                                                                                              |
| P23246  | SFPQ              | Thermo Fisher  | PA519663   | <a href="https://www.addgene.org/166960/">https://www.addgene.org/166960/</a>                                                                                  |
| P0DTD1  | NSP3              | -              | -          | <a href="https://www.addgene.org/165108/">https://www.addgene.org/165108/</a><br><a href="https://www.addgene.org/165131/">https://www.addgene.org/165131/</a> |
| P42212  | GFP               | Abcam          | ab6673     | -                                                                                                                                                              |
| P04406  | GAPDH             | Cell Signaling | 2118       | -                                                                                                                                                              |
| P68363  | $\alpha$ -tubulin | Cell Signaling | 3873       | -                                                                                                                                                              |
| Q93H4B7 | $\beta$ -tubulin  | Sigma          | T5293      | -                                                                                                                                                              |
| P60709  | $\beta$ -actin    | Abcam          | ab8224     | -                                                                                                                                                              |

**References**

1. Rut, W.; Lv, Z.; Zmudzinski, M.; Patchett, S.; Nayak, D.; Snipas, S. J.; El Oualid, F.; Huang, T. T.; Bekes, M.; Drag, M.; Olsen, S. K. Activity profiling and crystal structures of inhibitor-bound SARS-CoV-2 papain-like protease: A framework for anti-COVID-19 drug design. *Sci Adv* **2020**, *6* (42): eabd4596.
2. Rut, W.; Groborz, K.; Zhang, L.; Sun, X.; Zmudzinski, M.; Pawlik, B.; Wang, X.; Jochmans, D.; Neyts, J.; Młynarski, W.; Hilgenfeld, R.; Drag, M. SARS-CoV-2 M<sup>pro</sup> inhibitors and activity-based probes for patient-sample imaging. *Nat Chem Biol* **2021**, *17* (2): 222-228.
3. Zhou, Y.; Zhou, B.; Pache, L.; Chang, M.; Khodabakhshi, A. H.; Tanaseichuk, O.; Benner, C.; Chanda, S. K. Metascape provides a biologist-oriented resource for the analysis of systems-level datasets. *Nat Commun* **2019**, *10* (1): 1523.
